# Supplementary material for: Two Intense Decades of 19th Century Whaling Precipitated Rapid Decline of Right Whales around New Zealand and East Australia
Source: PLoS One. 2014 Apr 1;9(4):e93789. doi: 10.1371/journal.pone.0093789 (PMC3972245; doi:10.1371/journal.pone.0093789)
Supplement: Table S2 — Catches by fishery by year for the New Zealand and east Australian southern right whale catch series. Shore.NZ.L: catches of the New Zealand coastal shore-based fishery under the low scenario; Shore.NZ.H: catches of the New Zealand shore-based fishery under the high scenario; Shore.EA: catches of the east Australian shore-based fishery from Dawbin [17]; Off.NZ: catches of the New Zealand ship-based offshore fishery; Off.EA: catches of the east Australian ship-based offshore fishery; Bay.L: catches of the New Zealand ship-based bay whaling fishery under the low scenario; Bay.H: catches of the New Zealand ship-based bay whaling fishery under the high scenario; Soviet.EA: modern Soviet whaling in east Australian waters from Tormosov et al. [20]; Soviet.NZ: modern Soviet whaling in New Zealand waters from Tormosov et al. [20]. (XLSX) [file pone.0093789.s003.xlsx]

## Sheet: LandbyFish.csv
Table S2: Estimated catches by fishery by year for the New Zealand and east Australian southern right whale catch series. Shore.NZ.L: catches of the New Zealand Shore-based fishery under the low scenario; Shore.NZ.H: catches of the New Zealand Shore-based fishery under the high scenario; Shore.EA: catches of the east Australian Shore-based fishery from Dawbin [17]; Off.NZ: catches of the New Zeal…
Year	Shore.NZ.L	Shore.NZ.H	Shore.EA	Off.NZ	Off.EA	Bay.L	Bay.H	Soviet.EA	Soviet.NZ
1827	0	0	64	0	0	0	0	0	0
1828	0	0	119	0	0	0	0	0	0
1829	0	24	140	0	0	0	0	0	0
1830	28	120	336	0	0	0	0	0	0
1831	30	239	396	0	0	0	0	0	0
1832	23	140	295	0	0	0	0	0	0
1833	118	357	440	0	0	0	0	0	0
1834	202	451	654	0	0	23	23	0	0
1835	369	717	858	0	0	23	23	0	0
1836	209	468	825	0	0	448	472	0	0
1837	270	424	1358	0	0	338	431	0	0
1838	470	765	1282	22	1	861	1071	0	0
1839	518	548	1663	709	23	1041	1251	0	0
1840	328	385	821	2061	26	651	1375	0	0
1841	223	261	521	2545	30	82	198	0	0
1842	274	310	492	2793	214	0	0	0	0
1843	382	382	362	1997	230	0	0	0	0
1844	361	361	390	1139	248	0	0	0	0
1845	253	253	354	654	171	0	0	0	0
1846	205	205	246	487	73	0	0	0	0
1847	175	175	172	429	40	0	0	0	0
1848	106	106	150	342	30	0	0	0	0
1849	37	37	59	298	20	0	0	0	0
1850	32	32	123	188	11	0	0	0	0
1851	15	15	162	139	7	0	0	0	0
1852	38	38	37	106	1	0	0	0	0
1853	48	65	86	36	1	0	0	0	0
1854	14	14	27	19	20	0	0	0	0
1855	29	29	10	43	23	0	0	0	0
1856	44	44	23	101	22	0	0	0	0
1857	28	28	11	116	16	0	0	0	0
1858	13	13	5	390	2	0	0	0	0
1859	39	39	52	457	1	0	0	0	0
1860	13	13	42	428	20	0	0	0	0
1861	7	16	24	336	22	0	0	0	0
1862	12	14	57	109	21	0	0	0	0
1863	14	42	11	23	16	0	0	0	0
1864	10	24	22	2	2	0	0	0	0
1865	8	19	15	0	2	0	0	0	0
1866	1	7	12	0	58	0	0	0	0
1867	2	8	32	3	86	0	0	0	0
1868	5	10	51	94	104	0	0	0	0
1869	9	21	12	108	89	0	0	0	0
1870	10	23	29	103	50	0	0	0	0
1871	4	5	5	76	27	0	0	0	0
1872	11	38	6	10	11	0	0	0	0
1873	5	6	5	0	15	0	0	0	0
1874	10	11	6	0	10	0	0	0	0
1875	1	13	5	0	9	0	0	0	0
1876	2	4	6	0	7	0	0	0	0
1877	1	4	5	0	1	0	0	0	0
1878	2	2	6	0	0	0	0	0	0
1879	3	5	5	0	0	0	0	0	0
1880	3	6	6	0	0	0	0	0	0
1881	2	2	5	0	0	0	0	0	0
1882	4	8	6	0	0	0	0	0	0
1883	15	21	5	0	0	0	0	0	0
1884	28	34	6	0	0	0	0	0	0
1885	6	12	5	0	0	0	0	0	0
1886	3	22	6	1	0	0	0	0	0
1887	4	6	5	24	0	0	0	0	0
1888	1	2	6	27	0	0	0	0	0
1889	1	4	5	26	0	0	0	0	0
1890	1	11	6	19	0	0	0	0	0
1891	2	5	5	3	0	0	0	0	0
1892	1	5	6	0	0	0	0	0	0
1893	6	8	5	0	0	0	0	0	0
1894	3	4	6	0	0	0	0	0	0
1895	9	21	5	0	0	0	0	0	0
1896	74	74	6	0	0	0	0	0	0
1897	6	6	5	0	0	0	0	0	0
1898	3	3	5	0	0	0	0	0	0
1899	4	4	5	0	0	0	0	0	0
1900	11	11	5	0	0	0	0	0	0
1901	2	2	0	0	0	0	0	0	0
1902	3	3	0	0	0	0	0	0	0
1903	7	7	0	0	0	0	0	0	0
1904	5	5	0	0	0	0	0	0	0
1905	9	9	0	0	0	0	0	0	0
1906	3	3	0	0	0	0	0	0	0
1907	1	1	0	0	0	0	0	0	0
1908	4	4	0	0	0	0	0	0	0
1909	12	12	0	0	0	0	0	0	0
1910	4	4	0	0	0	0	0	0	0
1911	18	18	0	0	0	0	0	0	0
1912	20	20	0	0	0	0	0	0	0
1913	11	11	0	0	0	0	0	0	0
1914	5	5	0	0	0	0	0	0	0
1915	1	1	0	0	0	0	0	0	0
1916	1	1	0	0	0	0	0	0	0
1917	1	1	0	0	0	0	0	0	0
1918	3	3	0	0	0	0	0	0	0
1919	3	3	0	0	0	0	0	0	0
1920	12	12	0	0	0	0	0	0	0
1921	2	2	0	0	0	0	0	0	0
1922	4	4	0	0	0	0	0	0	0
1923	2	2	0	0	0	0	0	0	0
1924	4	4	0	0	0	0	0	0	0
1925	2	2	0	0	0	0	0	0	0
1926	1	1	0	0	0	0	0	0	0
1927	1	1	0	0	0	0	0	0	0
1928	1	1	0	0	0	0	0	0	0
1929	1	1	0	0	0	0	0	0	0
1930	0	0	0	0	0	0	0	0	0
1931	0	0	0	0	0	0	0	0	0
1932	0	0	0	0	0	0	0	0	0
1933	0	0	0	0	0	0	0	0	0
1934	0	0	0	0	0	0	0	0	0
1935	0	0	0	0	0	0	0	0	0
1936	0	0	0	0	0	0	0	0	0
1937	0	0	0	0	0	0	0	0	0
1938	0	0	0	0	0	0	0	0	0
1939	0	0	0	0	0	0	0	0	0
1940	0	0	0	0	0	0	0	0	0
1941	0	0	0	0	0	0	0	0	0
1942	0	0	0	0	0	0	0	0	0
1943	0	0	0	0	0	0	0	0	0
1944	0	0	0	0	0	0	0	0	0
1945	0	0	0	0	0	0	0	0	0
1946	0	0	0	0	0	0	0	0	0
1947	0	0	0	0	0	0	0	0	0
1948	0	0	0	0	0	0	0	0	0
1949	0	0	0	0	0	0	0	0	0
1950	0	0	0	0	0	0	0	0	0
1951	0	0	0	0	0	0	0	0	0
1952	0	0	0	0	0	0	0	0	0
1953	0	0	0	0	0	0	0	0	0
1954	0	0	0	0	0	0	0	0	0
1955	0	0	0	0	0	0	0	0	0
1956	0	0	0	0	0	0	0	0	0
1957	0	0	0	0	0	0	0	0	0
1958	0	0	0	0	0	0	0	0	0
1959	0	0	0	0	0	0	0	0	0
1960	0	0	0	0	0	0	0	0	0
1961	0	0	0	0	0	0	0	0	0
1962	0	0	0	0	0	0	0	0	0
1963	0	0	0	0	0	0	0	0	148
1964	0	0	0	0	0	0	0	0	0
1965	0	0	0	0	0	0	0	0	96
1966	0	0	0	0	0	0	0	0	50
1967	0	0	0	0	0	0	0	0	0
1968	0	0	0	0	0	0	0	0	0
1969	0	0	0	0	0	0	0	78	0
1970	0	0	0	0	0	0	0	0	0
1971	0	0	0	0	0	0	0	0	0
1972	0	0	0	0	0	0	0	0	0
1973	0	0	0	0	0	0	0	0	0
1974	0	0	0	0	0	0	0	0	0
1975	0	0	0	0	0	0	0	0	0
